# Supplementary material for: Effects of 14-day oral low dose selenium nanoparticles and selenite in rat—as determined by metabolite pattern determination
Source: PeerJ. 2016 Oct 20;4:e2601. doi: 10.7717/peerj.2601 (PMC5075706; doi:10.7717/peerj.2601)
Supplement: Data S1 [file peerj-04-2601-s001.xlsx]

## Sheet: Raw data negative_mode
	Animals:
Retention time : M/Z value	Control_1	Control_2	Control_3	Control_4	Control_5	Control_6	Control_7	Control_8	0.05 mg/kg bw Se-Nanoparticle 1	0.05 mg/kg bw Se-Nanoparticle 2	0.05 mg/kg bw Se-Nanoparticle 3	0.05 mg/kg bw Se-Nanoparticle 4	0.05 mg/kg bw Se-Nanoparticle 5	0.05 mg/kg bw Se-Nanoparticle 6	0.5 mg/kg bw Se-Nanoparticle 1	0.5 mg/kg bw Se-Nanoparticle 2	0.5 mg/kg bw Se-Nanoparticle 3	0.5 mg/kg bw Se-Nanoparticle 4	0.5 mg/kg bw Se-Nanoparticle 5	0.5 mg/kg bw Se-Nanoparticle 6	Water vehicle 1	Water vehicle 2	Water vehicle 3	Water vehicle 4	Water vehicle 5	Water vehicle 6	Water vehicle 7	Water vehicle 8	0.05 mg/kg bw Se-ion 1	0.05 mg/kg bw Se-ion 2	0.05 mg/kg bw Se-ion 3	0.05 mg/kg bw Se-ion 4	0.05 mg/kg bw Se-ion 5	0.05 mg/kg bw Se-ion 6	0.05 mg/kg bw Se-ion 7	0.05 mg/kg bw Se-ion 8	0.5 mg/kg bw Se-ion 1	0.5 mg/kg bw Se-ion 2	0.5 mg/kg bw Se-ion 3	0.5 mg/kg bw Se-ion 4	0.5 mg/kg bw Se-ion 5	0.5 mg/kg bw Se-ion 6	0.5 mg/kg bw Se-ion 7	0.5 mg/kg bw Se-ion 8
	A	A	A	A	A	A	A	A	B	B	B	B	B	B	C	C	C	C	C	C	D	D	D	D	D	D	D	D	E	E	E	E	E	E	E	E	F	F	F	F	F	F	F	F
65,9s : 153,031m/z	1000.46	0	2470.7	1778.5	3034.81	1816.06	4622.5	2591.32	5549.14	945.35	2567.19	1906.63	2449.34	5539.32	1407.08	2500.19	1677.21	1778.5	1980.13	3708.64	0	0	0	0	2057.77	1466.81	2443.79	3615.02	0	2420.76	3389.82	2314.75	0	1643.25	1983.98	2514.23	1716	2240.62	2542.67	3309.92	3488.16	3246.04	6557.58	5047.79
66,0s : 243,064m/z	0	0	0	2525.06	3335.57	0	4865.28	2763.71	4887.18	0	2991.46	1176.57	2399.19	0	1676.41	0	0	0	0	4472.06	0	999.75	0	0	2105.93	0	2582.98	0	1443.96	0	3262.23	2571.6	0	1560.87	0	2476.55	2190.68	2783.46	2565.28	0	3598.09	3100.74	4534.11	5885.1
67,9s : 245,082m/z	0	0	2072.13	1292.17	1525.06	2514.23	2991.46	1748.86	2488.31	0	1691.14	1015.29	1655.43	2708.55	0	1891.46	0	1106.78	0	0	0	0	0	2497.79	0	0	1777.14	2134.16	0	1770.75	0	0	1860.68	977	1440.43	2812.18	0	0	0	2352.44	2442.7	0	0	0
68,3s : 167,022m/z	1709.07	4401.06	5555.86	5202.5	6719.56	5170.37	7410.27	6419.75	7767.89	3257.23	0	0	5230.87	8562.13	0	0	3863.02	3161.53	5047.79	5739.25	4800.65	0	3143.98	5856.55	6557.58	3279.64	6764.35	6609.77	2803.66	4255.66	5812.42	6285.41	6326.15	5535.86	6269.23	6124.18	3116.61	4355.55	3719.06	4261.3	6081.59	4724.18	7085.08	9912.36
71,6s : 189,041m/z	1411.89	0	2991.46	0	4642.39	3677.62	4562.18	0	5036.85	1509.5	4769.06	3220.03	3473.97	0	0	0	4368.19	0	0	0	3669.5	4951.46	0	6096.93	3426.19	4127.6	0	0	2514.23	0	0	0	3777.1	3360.27	0	4779.15	6373.59	4105.82	0	3394.96	4242.15	0	3913.73	6308.56
82,7s : 161,046m/z	0	0	18974.4	18080.6	18392.5	14138	17976.2	20249.4	29481.4	5007.79	15390.4	10523.3	14461.4	21085.4	10386.2	16411.4	14521.2	0	0	18325.1	0	10633.3	13060.2	16027.1	15273.7	8038.3	0	21441	8315.55	0	17826.6	0	0	13686.6	0	19711.3	0	14472.6	17704.9	18767.9	16176.3	12246.9	19163.9	20128.2
83,4s : 263,024m/z	1877.37	0	0	0	3373.43	1953.27	2760.05	2479.82	4086.57	0	0	0	1716	3561.57	1706.16	1120.84	0	1071.49	2816.45	3652.52	0	0	1635.81	0	0	0	1796.36	3302.72	0	3182.36	1998.86	0	0	0	2590.59	2493.77	0	0	2217.36	2074.13	2915.87	2293.09	0	3910.19
86,2s : 307,026m/z	1355.45	0	4184.64	2273.37	0	3931.33	5979.54	0	0	0	3904.28	0	0	5639.63	1727.44	1227.91	3154.22	2127.31	0	5643.22	0	0	0	0	2500.19	2314.75	0	5224.96	0	0	0	4294.06	3635.33	3467.58	0	3931.33	0	2535.6	4140.05	3755.82	0	3948.08	6946.78	9433.75
87,9s : 269,126m/z	943.8	0	1213.21	2670.64	1394.05	1224.21	0	1449.81	1374.25	691.73	0	1306.03	0	1474.65	0	1300.87	0	1642.98	3211.41	1283.63	0	0	0	0	1482.35	0	0	2308.19	848.69	1682.26	1428.14	2083.85	981.91	0	0	2157.57	1948.36	2102.59	1282.45	1663	0	2269.98	0	0
91,6s : 215,104m/z	3973.19	2195.97	9528.32	6906.24	6613.32	6192.34	0	6758	10164.2	1464.08	4954.55	0	3924.29	3858.58	2879.95	0	3804.45	4642.39	7225.94	8185.31	0	2502.54	3777.1	6192.34	4720.09	2582.98	4802.96	0	3123.37	6890.18	4543.07	5753.08	5894.37	4026.77	4179.57	7073.71	5553.77	3814.59	0	5965.55	0	9433.75	10014.8	0
92,5s : 164,058m/z	0	0	3622.25	0	2581.58	2537.49	5813.79	0	5965.55	0	3571.18	1745.39	2874.76	2366.97	1229.71	2415.16	1470.33	1795.09	2576.09	4213.13	0	0	0	3669.5	3107.73	869.47	2413.34	3095.65	1189.27	3794.1	0	2291.73	3560.65	2606.73	0	3482.16	3074.57	2274.37	3023.39	2253.89	3984.78	3851.4	0	5176.01
94,7s : 187,108m/z	0	513.64	1842.55	0	1566.27	2266.33	2665.55	0	2291.73	0	1221.33	0	1341.54	2013.94	1179.3	1796.36	1014.83	0	1628.91	1656.32	618.56	964.73	1666.94	1713.21	1263.38	1216.3	1392.41	1451.63	0	1334.89	2064.85	0	1226.03	1744.2	1793.63	1285.52	0	896.72	1780.28	1961.19	0	2012.76	2120.07	2313.66
94,8s : 230,115m/z	2057.77	1314.31	5065.7	2487.07	5295.12	5608.71	3623.07	2960.02	0	0	4039.13	1583.92	2805.48	6906.24	2379.98	2762.62	2429.48	2552.08	3990.39	5182.36	0	0	2610.91	3777.1	4136.05	0	3309.92	0	1496.55	3363.55	5285.76	4778.42	4225.35	3200.49	2910.69	3299.11	0	2348.45	3101.19	2878.22	0	5412.91	0	5824.97
102,1s : 131,035m/z	927.02	0	2692.45	2177.51	2685.52	2792.32	0	1343.78	6118.06	0	2165.56	1193.42	0	3107.73	0	2057.66	0	2597.9	1565.11	4121.14	0	0	1908.76	2157.57	1190.21	0	0	0	0	2713.82	2907.77	1288.3	2438	1414.12	1772.01	1879	1980.49	2812.18	2370.26	0	6789.7	0	5636.08	7444.44
113,9s : 138,056m/z	1219.16	2751.13	0	0	12671.6	5427.57	6675.64	0	10540.9	1210.41	3677.62	3361.36	4980.22	4275.77	2017.02	3534.95	4912.71	4150.72	4474.15	7948.77	953.69	2612.73	4333.86	7310.32	6675.64	2665.55	6246.68	7683.2	1406.45	5253.77	5977.02	5427.57	5693.41	3514.28	4789.69	6246.68	0	8636.67	4902.56	3706.64	7641.87	6823.79	7718.38	9741.67
114,1s : 182,046m/z	0	8636.67	17777	8866.62	13022.9	11763.2	19047.5	0	0	4569.73	11062.2	7093.04	0	14973.2	8899.36	9433.75	5405.54	6096.93	10851.5	0	2859.24	5518.1	11170.5	14521.2	14714	3769.78	9569.64	0	4018.52	15863.6	13109	0	12925.5	6993.06	13243.8	12948	9209.06	0	12569.8	0	0	0	20867	0
116,0s : 342,084m/z	0	1782.08	3095.65	4902.56	0	5850.64	0	2363.31	0	1723.51	0	2902.4	5443.3	0	0	0	2145.57	2679.61	4048.98	4522.66	0	797.42	4388.85	5625.93	5758.98	2910.69	4629.3	0	2214.36	0	5076.34	4453.05	1039.67	2727.87	3916.2	4245.51	4891.91	0	5295.12	3359.18	0	5047.79	4883.55	4489.33
117,4s : 181,037m/z	3577.61	4572.41	8632.44	7314.32	6041.04	7051.67	7696.02	11072.8	9098.23	3345.28	6751.1	0	5054.25	5746.25	3167.31	0	5693.41	4972.71	0	8068.03	3082.85	7993.76	4453.05	6285.41	5977.02	6691.2	7445.53	0	0	6655.83	7590.76	11464.4	7444.44	5020.06	8094.49	5748.16	0	3338.41	5043.98	8008.4	5253.77	6007.65	7131.54	7916.79
118,0s : 365,137m/z	0	1388.12	2868.15	2007.34	2835.46	0	3196.13	2239.71	3981.28	1192.87	5397.29	0	0	3067.16	1660.5	2628.35	1752.48	0	2086.49	3821.64	902.09	1482.08	1777.14	2652.09	2648.37	0	2007.98	3015.69	1244.99	2857.06	3148.38	3984.78	2170.06	2177.96	2068.51	0	2001.63	2873.13	2413.34	1893.19	3948.17	2573.36	3796.25	3854.12
121,3s : 301,094m/z	1031.38	0	0	3234.08	1576.59	1697.34	0	1915.85	0	738.77	0	0	1230.47	1418.22	0	1250.68	2366.97	1953.27	2263.97	0	0	0	2589.32	0	2010.76	861	0	3871.21	0	2170.06	1798.84	1154.2	1427.41	0	911.46	0	2700.55	2620.72	1480.53	0	5007.25	3783.58	0	0
121,7s : 188,003m/z	0	15314.8	25335.5	35894.8	19876.8	27117.6	21112.3	0	0	13610.5	10807.9	20723.4	20273.7	23608.7	14535.6	0	10227.2	13508.8	0	19474.3	7654.69	14355.6	22485.2	24640.3	22562.7	17881.7	0	32703.1	11694.7	28062.5	0	0	0	19536.7	17704.9	0	13221.7	29705.7	18368.5	14050.8	15708.5	26536.8	18409.3	14628.8
122,2s : 227,998m/z	8276.41	10386.2	10001.9	9463.36	11731.6	9977.35	12948	0	16820.8	4861.17	17976.2	13640.8	17459.7	17679.2	8357.09	12203.6	6894.03	9569.64	15966.6	0	8525.68	11561.6	5861.62	20878	15836.9	15708.5	0	8038.3	4984.12	14272.5	17350.7	13934.4	9277.39	9074.93	21041.9	14472.6	5476.92	6007.65	8432.18	12868.7	7236.28	12572.7	0	0
122,9s : 147,049m/z	1651.53	1105.05	0	2083.85	4115.41	0	0	2429.48	0	0	0	1277.78	3759.09	0	2110.36	0	0	0	1460.03	0	0	1953.27	7187.49	9271.76	0	2286.66	0	4436.55	1017.47	0	8008.4	2537.49	7033.6	0	0	0	3238.36	3441.64	1247.08	1120.84	0	0	0	0
123,1s : 144,066m/z	0	4916.25	0	8482.69	14208	13754.6	26672.9	14813.6	18080.6	3093.63	14272.5	6384.59	9415.39	12717.2	5879.55	11023.8	0	3700.45	12925.3	17777	2464.84	7033.6	8562.13	14813.6	10124.2	0	4712.83	9741.67	3859.11	8696.44	10255.6	8857.26	8525.68	6041.04	8766.49	13640.8	0	11155.5	8270.04	5487.66	10477.8	9167.43	17149.2	20901.3
123,3s : 321,041m/z	7000.73	4313.63	7654.69	5678.62	14730.5	6817.61	20273.7	0	11040	9516.41	20128.2	8185.31	7344.67	16956.8	11618.4	9710.66	0	7148.3	10591.2	0	7131.54	8473.88	6081.59	10227.2	7742.18	6883.88	8003.4	10869.4	4867.55	11803.4	16176.3	9531	9427.94	8019.62	0	7901.79	9938.7	8019.62	8617.16	11642.1	11678.1	8636.67	16261.3	18368.5
123,4s : 229,119m/z	0	0	0	3916.2	4079.11	2822	0	0	0	1415.57	3110.82	3941.54	4273.68	4624.8	2214.72	3916.2	2564.65	0	3462.64	3534.95	0	0	0	3257.23	0	2067.12	1884.45	3765.22	0	4929.73	4249.92	0	4798.28	2544.3	2967.34	0	0	0	2606.73	0	5188.09	4275.77	5824.97	6246.68
124,5s : 357,083m/z	6621.32	11618.4	12624.6	15646.6	10597.4	12466.6	15464.5	15415.8	28115.5	7884.91	9374.08	11131.7	13560.3	9945.17	13362.2	14730.5	12338.9	15464.5	19815.7	23031.4	5530.45	7236.28	10408.7	13296.1	12210.2	4298.78	12375.8	12671.6	9051.47	21933.7	10650.7	12962.6	11558.2	11803.4	7459.35	14883.9	15050.9	17230.2	19815.7	15600.7	26286.1	30225.5	17459.7	21519.2
127,9s : 216,982m/z	0	2666.01	3692.4	6804.43	6402.39	8525.68	6258.59	5196.32	7310.32	3003.87	3729.15	0	7712.66	5926.74	4572.41	3008.14	2204.84	3635.33	0	6946.78	1174.15	2696.91	8739.44	11824.2	5847.55	2812.18	6506.04	6041.04	2920.6	0	0	7712.66	5824.97	3154.22	3858.58	5664.54	4622.5	6731.47	4296.15	3501.92	0	6557.58	5182.36	5965.55
128,9s : 277,119m/z	844.39	0	2923.97	2506.15	0	0	2825.19	2643.43	5222.69	0	0	0	2465.56	0	1388.12	2539.85	2179.24	0	3093.72	5412.91	0	1566.27	0	2847.11	1993.14	0	2991.46	2356.63	0	2558.23	0	0	1727.44	0	0	0	0	0	2518.14	0	3238.36	2176.96	3724.42	4457.16
129,0s : 324,074m/z	3450.28	7788.31	4867.55	6702.92	5834.97	7696.02	0	9005.08	12650.8	1034.91	4494.33	0	5627.1	7743.73	2503.45	5573.77	2591.96	4578.6	7437.26	9347.72	1471.8	6651.56	2869.61	11131.7	3647.56	3973.19	5273.68	2983.29	2246.78	7444.44	7816.45	6542.5	8120.05	0	6706.11	4105.82	4821.94	2391.79	10268.9	9131.69	7489.46	11207.7	6804.43	8094.49
129,7s : 346,108m/z	2887.42	3324.85	6538.04	4247.46	5398.32	4562.18	6041.04	0	7864.24	3934.86	7294.32	3610.55	0	4889.06	2594.28	4814.78	3478.11	2835.46	4622.5	7039.14	2394.34	3926.56	4221.89	3948.17	4249.92	0	4318.99	5518.1	3324.19	4813.68	6413.21	5994.11	4179.57	3101.19	3981.1	4012.97	4685.9	3698.86	4361.37	0	4591.82	4113.99	5740.62	7373.55
131,7s : 239,998m/z	0	2530.24	12027.1	10353	5758.98	8345.73	9427.94	0	10306.9	8202.67	6308.56	0	0	6666.11	6789.7	0	0	11763.2	0	6634.02	2163.19	0	6405.85	6741.3	5280.23	6139.71	9945.17	0	7216.49	5002.88	7294.32	0	14355.6	6231.76	9364.2	8448.09	6981.66	0	10760.3	8146.44	6404.48	10802.4	3859.11	6628.87
132,0s : 218,104m/z	0	6475.77	11731.6	10644.7	10124.2	13022.9	18409.3	13082.9	0	0	4133.02	0	0	0	0	7533.31	4642.39	8242.52	9507.41	7437.26	0	4436.55	7718.38	12572.7	10650.7	0	10807.9	16940	0	18409.3	11590.6	8003.4	13984.4	0	0	10885.6	10154.8	0	9020.17	7609.76	14973.2	16702.6	10546.5	8967.35
132,2s : 291,109m/z	38208.8	19876.8	5144.9	27094.9	27937.7	28181.2	8333.27	25550.2	5285.76	18854	2949.64	25550.2	0	1545.14	24849.1	26547.5	18854	36699.3	37389.9	1973.4	0	30225.5	50948.6	70866.6	0	39571.1	25550.2	50789.7	24360	11170.5	55440	16646.7	41824.8	9540	0	11505.6	36699.3	66205.4	3840.21	9981.17	27094.9	32358.8	7410.27	0
132,9s : 246,993m/z	0	5523.63	3334.3	6285.41	3663.05	6946.78	0	5510.44	8647.68	1784.46	4296.15	0	0	0	3530.68	5510.44	4285.05	4895.91	0	8810.04	968.34	2355.72	4628.58	5693.41	4652.84	0	7236.28	0	2755.68	8172.72	3120.16	0	2910.69	0	0	6542.5	6114.97	5170.37	0	0	7925.68	0	0	7993.76
134,1s : 242,013m/z	0	1189.27	0	3294.93	0	5523.63	7788.31	0	3656.49	0	6074.59	0	1207.68	6062.04	2827.46	3991.3	0	5991.65	3765.22	6285.41	0	0	5979.54	2313.66	0	3098.65	6628.87	0	0	3999.06	3835.19	4113.99	0	3783.13	6096.93	9395.66	4039.13	547.83	9540	8473.88	5786.5	7391.73	8617.16	7544.31
135,6s : 203,003m/z	43578.2	32358.8	13630.5	46021	79727.3	0	28062.5	48403.1	23444.4	39269	9540	0	54817.2	13082.9	53674.5	48125.4	44205.8	54817.2	56763.2	21112.3	18217.4	39874.7	56763.2	79215.7	67005.2	53674.5	40387.4	70366.9	41691.1	41517.5	82952.1	0	75647.1	36030.1	9654.84	43578.2	56375	72825.1	27255.4	44205.8	55997.4	71193.5	42704.7	18663.6
136,0s : 285,063m/z	2731.05	0	0	4669.08	4389.34	5970.84	4669.08	0	6368.01	0	2727.96	4712.83	5808.24	4964.82	2443.79	0	3534.95	5717.48	3887.83	5023	1010.92	0	5786.5	11647.8	3884.15	2434.37	0	5412.91	1964	5994.74	4703.36	3555.33	5427.57	2765.71	0	3101.19	5374.11	4190.95	4193.88	4959.19	6557.58	6646.02	0	3546.13
136,4s : 411,127m/z	0	0	1998.86	0	1689.68	1298.9	2083.85	1249.4	3441.64	0	0	0	0	0	1133.51	1579.59	0	0	895.18	1799.29	478.03	0	0	0	1103.75	0	0	1166.3	763.89	1650.1	1499.8	0	1603.72	1275.62	1754.94	1626.16	0	1501.08	1757.39	1526.38	2291.73	1563.19	2857.06	2610.91
136,8s : 326,089m/z	4761.06	4751.7	9791.85	12962.6	7854.42	9147.6	8469.27	9399.84	14272.5	2372.1	0	5731.2	6783.81	12375.8	6959.21	8488.97	8650.99	10112	8636.67	12338.9	4413.38	0	5717.48	8276.41	9892	6506.04	7696.02	0	5793.22	0	9710.66	0	7977.03	5653.13	7884.91	8288.18	12053.7	10885.6	0	12210.2	13934.4	13992.6	14138	9098.23
137,2s : 371,099m/z	6041.04	5879.55	8133.71	7654.69	7739	6706.11	10935.1	8571.16	13192.9	2635.41	6413.94	7445.53	7039.14	0	5253.77	6749.46	3751.33	9892	6952.75	9192.06	1830.41	4534.11	0	7544.31	6085.48	0	5731.2	5940.28	0	0	7416	0	7635.96	7416	5443.3	9798.9	0	8288.18	0	8311	10282.4	14355.6	12870.1	12053.7
137,5s : 233,013m/z	0	3482.16	9374.08	0	6172.43	7373.55	0	0	7097.85	4150.72	0	5273.68	5144.9	22037.8	3123.37	5664.54	0	0	0	12618.2	4227.96	4145.58	5359.46	4425.11	8488.97	3467.58	8617.16	7339.27	2644.59	0	5866.62	0	0	0	0	0	0	0	9240.7	5025.09	0	0	0	6431.85
138,1s : 261,008m/z	0	17881.7	41049.3	38407	24777.2	0	35687.7	0	32703.1	12761.2	19164.5	23444.4	18048.6	34075	16977.8	15065	15158.8	0	21826.5	27255.4	13342.3	0	0	17976.2	19317.8	24360	23444.4	22212	0	45530.8	26546.8	29989.3	0	0	26632	0	11362.1	17777	20723.4	24266.5	21041.9	0	23057.3	24849.1
139,4s : 269,067m/z	0	14535.6	37945.8	0	16521	16956.8	10001.9	4779.15	31244.8	17459.7	22095.9	6924.05	10140.4	45827.8	19876.8	10546.5	16027.1	17419.5	23108.3	29976.1	8038.3	2005.34	7948.77	32176.2	17350.7	27117.6	18467	8899.36	30225.5	9968.9	21738.7	15036.7	13610.5	14272.5	46021	18974.4	7310.32	16571.1	22664.2	19608	5733.43	19164.5	4178.57	10764
139,9s : 258,992m/z	11860.8	6025.13	8285.41	10151.4	0	10707.1	8218.13	10084.2	0	4278.96	5020.06	5940.28	6583.49	8754.31	5007.79	3801.27	0	3495.6	7788.31	5808.88	2767.79	0	5627.1	9135.69	7187.49	8288	0	8196.31	0	0	0	12210.2	0	6834.52	0	9531	3407.99	4779.15	3616.2	7225.94	6326.15	9286.84	6062.04	4723.81
140,1s : 278,073m/z	742.36	0	3729.15	0	0	3309.92	2714.45	4100.14	6749.46	0	0	2085.98	1363.37	0	1464.81	0	5281.04	3999.06	2854.7	0	0	1204.19	4027.13	0	0	0	0	2530.24	1053.78	0	0	0	0	1532.65	2299.34	1942	4540.62	0	3167.31	3549.77	3629.24	4184.64	8218.13	12634.1
141,0s : 125,025m/z	0	2170.06	6315.61	0	3412.04	3847.58	6607.24	0	7955.13	1316.93	4627.77	3788.02	0	4543.07	0	4700.45	2015.39	4453.05	4273.68	0	0	3564.8	0	2510.59	4798.28	0	2944.56	2885.24	0	3647.56	5590.56	0	1591.06	0	0	3742.96	2989.91	7073.71	4540.62	3471.54	0	0	10825.5	11040
141,4s : 204,983m/z	0	3220.03	4814.78	0	0	3879.27	0	0	4933.91	0	5970.84	0	0	3910.19	4313.63	0	4122.47	0	0	9477.45	1788.97	2897.6	0	2053.55	0	0	0	18174.5	0	0	0	0	3287.1	2810.73	4592.82	0	0	7163.53	6993.06	4501.69	4027.13	0	9399.84	10151.4
142,3s : 336,073m/z	0	5007.79	20451.3	25381.7	15158.8	15050.9	14628.8	8754.31	19711.3	10676.9	10078.9	3133.08	8245.59	9710.66	17881.7	11319.7	7544.31	14355.6	11835.1	16670.6	3810.68	0	12484.4	17149.2	11590.6	13407.7	11131.7	6704.47	12282.6	17300.6	16769.8	14521.2	21085.4	13241	11456.5	11754.1	14050.8	1787.33	15805.2	14535.5	10676.9	18663.6	0	9531
144,8s : 109,030m/z	1337.04	4659.9	5815.06	8176.94	7195.58	0	8792.31	9217.97	9740.32	1377.77	3071.25	7236.28	0	10408.7	3426.91	3467.12	0	0	8108.42	6834.52	0	3629.24	7828.12	10764	9192.06	7085.08	0	8488.97	2187.25	0	8357.09	6949.39	7743.73	6691.2	8276.41	0	3530.68	6628.87	7277.41	6192.34	8866.62	9569.64	7843.39	7747.09
145,2s : 188,987m/z	18409.3	27117.6	48403.1	50789.7	55584.1	38626.4	47656.7	39874.7	51882	27475.6	28596	44863.2	43578.2	66076.6	47326.2	31673.6	34090.3	33385.4	44863.2	51240.6	20723.4	25158.5	30225.5	50948.6	51882	45530.8	36599.1	64022.4	27470.4	55997.4	37945.8	59246.1	50211.8	40847.6	36546.2	34328.3	24800.7	48403.1	32922.1	29081.4	48125.4	55440	44863.2	34328.3
147,0s : 114,093m/z	0	0	0	2048.55	2420.76	3067.16	5087.69	3339.82	5378.02	0	0	1463.01	2490.04	0	0	2604.18	958.97	0	0	4309.63	0	1805.08	1984.61	5281.04	3019.58	1254.1	1986.89	2263.97	0	1815.4	3324.85	0	2887.42	1430.83	1160.32	0	1445.51	1724.17	0	2424.66	3887.83	2744.67	4568.91	3780.61
147,6s : 158,082m/z	5412.91	7373.55	29705.7	11085	26536.8	21441	41049.3	21393.8	41986	5202.5	0	8859.53	11131.7	25550.2	7788.31	21153.3	13811.6	6551.64	0	40387.4	6764.35	0	13802.9	20013.5	20273.7	7609.76	0	18767.9	5979.54	17879.7	27842.5	0	23052.8	10257.8	14461.4	16571.1	9654.84	12948	10986.7	11860.8	17230.2	13682.2	37389.9	42875.8
149,4s : 230,102m/z	0	0	6719.56	1623.02	0	0	0	4138.87	9876.9	2476.55	4088.93	0	0	3602.97	2915.87	4519.39	0	4207.22	2888.15	6731.47	1071.21	0	0	0	1214.48	2469.75	0	0	1822.7	0	4959.19	0	0	0	2007.98	1336.22	0	0	5818.15	6062.04	5590.56	7225.94	9569.64	7144.81
150,6s : 230,014m/z	7236.28	13934.4	22095.9	0	0	20451.3	21826.5	18025.3	17350.7	9098.23	12717.2	16977.8	18654	19968.1	15314.8	7828.12	13296.1	7466.82	9798.9	20128.2	0	8810.04	14208	12053.7	27842.5	16889.4	17856.1	20382	9399.84	26547.5	14799.8	21112.3	24774.5	16769.8	15836.9	20467.9	8967.35	15415.8	14272.5	9477.45	9449.64	10353	15613.4	13731.6
150,9s : 338,088m/z	0	7598.13	6413.94	20382	0	11530.7	15863.6	3228.72	0	6368.01	9853.27	0	3164.44	11332.6	6196.61	8068.03	7966.4	11505.6	8432.18	0	3414.88	0	0	0	1835.08	4512.06	0	0	0	0	11775.2	0	15805.2	0	0	21441	0	0	19047.5	18080.6	20128.2	15613.4	6134.08	13577.3
152,2s : 273,008m/z	15158.8	9449.64	10869.4	28173.8	0	18822.6	13255.7	33385.4	11754.1	3618.11	0	15464.5	11775.2	0	7598.13	15667.6	9517.68	9007.72	16769.8	0	6436.27	11014.4	16411.4	12338.9	0	0	7847.51	16261.3	4639.84	29704.8	10052.8	28077.7	20111	22062.4	0	8832.77	19474.3	15890.6	6557.58	13243.8	29208.2	27791.4	21393.8	13060.2
152,3s : 193,051m/z	8019.62	3794.1	0	12662.4	0	9501.72	11155.5	15966.6	0	1397.97	1361.55	6246.68	6454.98	0	4401.06	13508.8	4464.45	5319.3	5653.13	2341.67	2323.22	0	10909.1	11435.6	2679.61	0	0	6808.88	3394.96	10164.2	0	0	10935.1	8245.59	0	6952.75	8734.05	7901.79	3462.64	7747.09	13640.8	13355.3	12717.2	0
152,9s : 385,115m/z	2552.08	2472.08	3773.19	4188.01	2166.83	3466.4	3762.04	3003.87	4769.06	1113.43	0	4549.53	2558.87	2511.27	1927.66	3359.55	0	2464.11	2293.64	3402.08	0	3373.43	2570.01	3081.03	1849.8	0	2552.08	2762.62	2029.77	3560.65	0	3095.65	2692.45	2352.44	1588.7	4140.05	0	3200.49	4006.25	3641.37	6628.87	4984.12	4358.65	5625.93
154,0s : 172,992m/z	52033.1	73904.9	115088	139964	138826	111081	153424	77248.5	131642	62739.7	109491	79727.3	77248.5	105789	90934.8	98654.9	86942.5	109491	104076	120275	49673.1	82952.1	82952.1	126832	107434	152122	98654.9	111081	59246.1	138826	122634	81627.3	118589	115088	115088	143251	71376.3	100056	111081	138826	70866.6	107434	68536.3	109491
154,4s : 134,061m/z	26458.3	53674.5	84568.6	96547.4	110043	96789.5	124314	67724.4	103059	48189.9	61111	67674.3	67724.4	73904.9	63782.2	0	59246.1	77248.5	72825.1	86942.5	24360	46519.7	96789.5	86942.5	89022.4	65853.6	79727.3	96789.5	49673.1	81194.6	94511	0	85827.5	71376.3	62739.7	84568.6	86444	115088	64937.5	79215.7	101236	82952.1	86444	86942.5
154,5s : 178,052m/z	149176	90934.8	204079	184972	184972	184972	210089	179043	160840	124345	134024	168687	134024	126832	166137	204079	156073	179043	126832	149176	68536.3	107434	184972	156073	179043	0	168687	184972	101236	184972	210089	68536.3	204079	160840	90126.6	204079	173487	204079	184972	184972	216829	210089	220647	219543
155,0s : 429,083m/z	4133.02	6634.02	1604.78	12441.5	2123.32	4995.49	0	10296.3	6213.25	0	0	8357.09	2508.05	1190.21	3266.12	5069.98	2756.59	3914.02	3941.54	0	0	2949.64	0	5405.54	1738.42	0	3409.67	4618.95	3189.59	5635.5	2405.62	2591.96	3926.56	0	0	3884.15	8288.18	5573.77	4800.65	3999.06	13109	13060.2	8482.69	4810.59
158,2s : 371,140m/z	0	1229.71	2366.97	0	1883.46	1722.33	2937.37	2546.81	0	636.5	0	0	2348.45	2465.56	1856.79	0	0	2620.72	2017.02	2402.53	0	0	0	2591.96	2775.97	0	0	2180.31	1313.07	0	1469.24	0	2796.5	0	0	1957.56	2266.33	0	2720.5	0	2408.3	2212.91	2524.7	2920.6
158,7s : 299,077m/z	3257.23	0	1549.75	2727.96	4338.68	3727.88	3114.16	0	0	2314.57	1485.88	2944.56	6906.24	2537.49	0	0	0	5412.91	5837.88	844.66	1239.8	3309.09	6527.77	0	3148.38	0	0	4200.17	2558.87	1070.73	6675.64	2461.69	0	1703.34	0	0	3879.27	6952.75	0	0	0	2842.55	0	0
159,0s : 255,089m/z	2259.18	1293.3	3872.85	1328.57	0	3810.68	0	0	0	1666.94	3256.5	0	2904.03	2217.36	0	3087.48	0	2415.16	2547.99	3372.52	0	1360.17	1765	3501.38	2947.46	1816.7	0	2733.05	1598.63	4867.55	0	0	3587.28	2685.97	2232.36	0	2796.5	0	0	3279.64	3401.2	3519.37	5382.47	5002.88
159,0s : 375,132m/z	0	1272.76	3264.44	2591.96	0	0	0	2791.6	0	1693.68	0	2718.64	1839.33	0	0	2274.37	1694.95	0	814.83	2558.23	0	0	0	0	2714.45	1192.33	0	3236.9	0	0	3092.75	1535.82	2307.19	2202.8	2561.59	2696.91	3322.64	2226.42	0	2606.37	0	0	4956.64	0
159,4s : 203,003m/z	32703.1	16977.8	0	42125.9	44863.2	32824.3	25381.7	43380	44782.8	23608.7	25550.2	27640.7	23893.1	31522.3	36693.5	20249.4	30225.5	27255.4	33836.6	28181.2	14535.6	19164.5	32824.3	47957.1	41986	21949.7	29641.6	25381.7	21781.4	38208.8	34975.2	9892	67651	28596	24640.3	15415.8	28142	37974.1	24193.8	26305.7	21738.7	39874.7	52684.6	28596
159,8s : 151,041m/z	2203.53	0	4464.45	6149.79	3872.85	0	4361.37	10840.2	0	895.54	9192.06	0	12798	9415.39	1993.14	3153.49	5808.88	2652.09	0	4427.83	0	4736.42	0	7871.46	7876.46	1836.15	0	0	0	0	0	8176.94	6538.04	0	7216.49	0	1700.68	4469.88	0	2470.7	0	0	0	4043.68
159,8s : 239,999m/z	0	0	12925.5	7779.03	4273.68	7163.53	5382.47	2409.97	5813.79	4043.68	7779.03	0	3243.13	0	9217.97	1965.95	0	4318.99	0	8636.67	1361.55	0	3934.86	6894.03	4379.67	4213.13	6924.05	1894.46	0	4494.33	11023.8	4836.88	8897.91	3719.06	0	5412.91	2669.37	0	6355.83	4060.42	4422.2	7533.22	0	5459.21
160,2s : 273,092m/z	0	0	2039.87	1300.1	0	1405.64	2190.68	1040.62	3365.61	0	2515.78	0	0	1129.4	0	1906.63	0	1141.59	2067.6	1787.33	0	928.99	0	0	1348.4	0	0	1650.92	0	2001.63	2251.44	0	0	1181.92	0	0	0	0	1469.24	0	1128.41	1664.3	3287.1	2859.24
160,2s : 193,036m/z	3006.51	4237.88	4401.06	5047.79	4788.51	4441.6	7144.81	0	6993.06	2700.55	4247.46	0	4720.09	4345.37	3482.16	4180.29	916.7	0	0	5979.54	1674.5	2852.66	6727.11	4169.51	3934.86	2859.24	0	5064.07	2598.17	5808.88	0	3731.51	6413.94	2999.14	2497.79	0	3934.86	5890.1	4724.18	0	0	0	0	0
160,3s : 242,997m/z	0	63782.2	31802.9	0	34090.3	0	0	0	20273.7	11953.1	21321.9	16153.6	90934.8	50948.6	0	43294.1	12761.2	20273.7	65853.6	16011	16261.3	67005.2	0	25998.7	26393.3	19047.5	21826.5	0	9798.9	31802.9	0	101236	38407	31770.4	31802.9	100056	0	0	0	12586.9	0	46519.7	0	10633.3
161,8s : 159,066m/z	3765.22	5253.77	11131.7	0	0	0	16510.7	13845.8	19129.8	0	5285.76	6764.35	9923.73	7391.73	4836.88	6348.1	7310.32	8766.49	0	10124.2	0	3854.58	10723.4	13583.3	9560.46	7314.32	0	12442.6	4413.38	13845.8	0	0	15385.2	9320.76	7737.38	11155.5	6258.59	13296.1	0	10195.1	18465.1	16106.4	18767.9	12246.9
161,8s : 291,961m/z	0	0	0	3796.25	0	2341.67	0	6085.48	5510.44	1127.68	4557.26	0	5344.12	6315.61	1599.86	0	0	0	4685.9	3926.56	838.17	2314.75	0	4245.51	0	2260.64	3992.57	0	879.31	1983.16	3477.75	4606.59	3698.5	2269.98	3432.32	2960.02	1253.64	0	0	0	2971.66	4318.99	3198.85	2582.98
161,9s : 115,077m/z	0	1464.81	2177.96	0	4583.15	0	4786.23	3862.11	4984.12	0	0	2522.79	4221.89	3228.72	978.08	0	0	2390.95	1888.01	0	795.07	0	3731.51	4821.94	3714.39	1683.68	3033.17	2949.46	0	0	0	2882.13	3742.96	1953.27	0	2226.42	1927.66	4064.88	1957.56	0	0	3984.78	0	4883.55
162,0s : 212,003m/z	28719.8	0	100056	81627.3	95619.2	81627.3	95619.2	90934.8	113800	0	90934.8	57606.1	61929.6	86942.5	73904.9	84529.6	70866.6	61929.6	86778.3	103432	37671.4	55440	42560.9	101236	76368.1	81194.6	57606.1	81627.3	35687.7	111053	107434	52033.1	101236	62739.7	71376.3	66205.4	64937.5	84568.6	70866.6	94511	66205.4	94511	96789.5	100056
162,3s : 425,013m/z	1283.63	1479.31	0	0	0	0	1681.44	3534.95	0	870.79	0	2233	1921.5	2565.28	1348.4	0	2793.77	1676.14	3006.51	2842.55	1748.86	1242.93	1484.88	2286.66	2425.21	1860.5	4954.55	1682.91	1152.16	1671.79	2641.06	0	1938.51	1927.66	0	1574.14	1384.1	1762.03	2233.18	0	1525.54	0	1980.49	0
165,2s : 283,083m/z	0	41256.7	4519.39	0	37974.1	42125.9	0	28719.8	6431.85	2843.57	67724.4	40387.4	40387.4	0	2530.24	37389.9	8405.82	8571.16	11561.6	14628.8	822.64	12586.9	111081	111081	11843.9	2000.77	27640.7	29989.3	0	0	14472.6	18080.6	0	2897.6	13754.6	28142	22939.9	4816.41	96789.5	27640.7	23370.9	59246.1	104076	143251
167,1s : 242,014m/z	0	36693.5	58881.4	0	23031.4	70366.9	84438.6	0	0	31802.9	39874.7	0	0	0	29208.2	0	21541.3	28719.8	0	34328.3	29208.2	0	46519.7	0	21441	33890.2	67674.3	0	0	0	71193.5	0	0	52351	52684.6	0	0	0	42704.7	49665.1	39571.1	0	22212	41049.3
167,5s : 192,068m/z	103732	166137	143251	111081	0	139964	107434	134024	217799	84568.6	179043	121439	179043	173487	118589	115088	111081	90934.8	173487	210061	110043	153424	139964	216829	131642	104076	121439	139964	143251	50452.5	153424	168687	143251	89988.7	160840	115088	103732	143251	139964	0	111081	153424	152122	168687
168,3s : 289,041m/z	9285.48	0	0	0	17200.3	15647.5	14985.3	17407.5	27117.6	0	0	19474.3	0	0	13934.4	11647.8	8172.72	0	13346.6	0	9168.24	18217.4	0	0	0	0	0	0	0	19968.1	28846	0	18663.6	10935.1	10286.3	0	6475.13	10227.2	11224.3	0	10825.5	17704.9	0	19711.3
168,9s : 222,080m/z	0	2503.45	5222.69	0	0	3244.95	0	0	13407.7	2769.79	7445.53	3840.21	4849.52	6551.64	0	0	6599.33	5866.62	12210.2	12027.1	0	2751.13	0	6419.75	6436.27	0	2718.64	4736.42	2068.97	3213.81	0	5303.03	0	2644.59	5549.14	0	3700.45	8146.44	8792.31	0	4167.74	0	5343.21	11835.1
170,8s : 209,082m/z	1257.2	0	3162.89	0	3567.25	2231.39	2803.66	0	3495.24	1080.52	2694.82	2755.13	0	2064.94	0	0	800.84	1408.91	1504.18	2956.27	0	0	0	3208.64	2247.99	1768.75	1463.01	2710.18	1140.36	0	0	3872.85	0	0	0	1713.21	961.52	0	1808.17	0	2822	0	4318.99	3332.12
171,2s : 275,059m/z	8571.16	13362.2	0	22095.9	20901.3	25550.2	4425.11	12743.8	21085.4	10084.2	16702.6	12743.8	16769.8	19088.7	12517.1	5324.76	6285.41	0	6345.47	17230.2	6114.97	7779.03	17659.3	30225.5	24266.5	10001.9	16153.6	19536.7	11085	24849.1	21032.5	19960.4	27475.6	8462.36	11843.9	15890.6	0	12039.4	10485.7	5758.98	8598.53	8329.64	12375.8	15600.7
172,6s : 153,020m/z	5555.86	3530.68	5746.25	0	9912.36	12137.1	6952.75	9876.9	9501.72	0	3446.64	6085.48	11530.7	7187.49	5391.75	0	5539.32	7683.2	11131.7	7739	1388.48	3788.02	12159.3	18400.6	7590.76	0	9147.6	10366.2	4108.14	8017.8	13686.6	7097.85	0	0	3328.93	8019.62	7112.45	10723.4	6888.9	4629.3	0	7669.78	7314.32	5678.62
173,5s : 445,189m/z	0	0	14472.6	0	6296.74	4685.27	0	0	11590.6	2198.15	10561.3	0	3505.38	10164.2	4751.7	0	4549.53	3785.92	0	7294.32	0	3990.66	5178.45	5352.82	0	0	6085.48	7046.85	0	6231.76	8125.71	0	4959.19	4481.42	5054.25	5076.34	6727.11	4140.05	0	0	0	0	11803.4	8571.16
174,2s : 194,047m/z	3134.62	1059.19	1635.72	3714.39	0	2740.52	2206.14	3622.25	1622.93	0	1155.23	2277.39	9252.21	0	1114.87	0	1967.49	0	6817.61	1323.19	0	0	7533.31	9517.68	3762.86	3598.09	2323.22	0	0	1435.12	0	3271.74	5253.77	1578.77	0	0	2461.69	0	0	0	1652.8	3400.96	1179.3	0
175,5s : 146,061m/z	1370.13	2915.87	0	0	4521.48	3167.31	7277.41	0	0	0	0	4180.29	6246.68	4685.9	0	0	0	1367.97	3548.04	0	1216.3	2107.48	0	3623.07	0	0	3361.36	2558.23	0	13146	0	1717.84	0	0	2700.55	0	1760.72	3931.33	0	3948.17	3372.52	0	6883.58	3620.43
177,7s : 231,078m/z	21402.2	29208.2	11464.4	11464.4	12441.5	7816.45	22939.9	16702.6	14708	5837.88	48403.1	0	28846	14472.6	7112.45	14231.9	28026.1	0	25282	13508.8	0	22485.2	23893.1	34090.3	46519.7	0	32489.5	23790.3	0	12186.2	50687.7	37389.9	13255.7	4390.19	7039.14	25350.5	12466.6	19711.3	26228.1	8681.9	12840.3	11558.2	32134.3	36699.3
178,3s : 201,113m/z	5253.77	8146.44	14842.8	0	12053.7	11155.5	13832	14351.7	21777.6	5443.3	13832	9147.6	10330.7	18368.5	7373.55	10802.4	0	10633.3	12598.5	0	3292.57	5793.22	14714	13811.6	13342.3	8598.53	12743.8	15036.7	7540.13	12517.1	19317.8	0	19317.8	6392.81	9981.17	10723.4	10759.2	0	13845.8	9312.31	18049.4	12798	21781.4	22009.7
178,4s : 127,077m/z	4061.7	0	19651.5	9958.9	0	0	24193.8	0	48189.9	0	0	9945.17	0	0	4916.25	17600.4	0	23893.1	18822.6	32176.2	1640.53	0	12743.8	0	0	10330.7	13640.8	0	0	19155.6	14050.8	10760.3	16977.8	10633.3	0	0	7712.66	21441	0	0	12624.6	21625.5	0	58881.4
178,8s : 461,186m/z	13630.5	18738	66205.4	23790.3	41256.7	23893.1	38208.8	18541.5	56375	15836.9	36699.3	21826.5	0	41517.5	32358.8	40387.4	23108.3	22212	0	63771	0	27791.4	0	23108.3	31802.9	11207.7	20723.4	46021	18541.5	0	30681.3	41517.5	30954.8	24360	28846	29705.7	21625.5	32134.3	47326.2	40847.6	51240.6	25158.5	61111	51240.6
179,2s : 187,007m/z	16190.3	0	3845.3	18738	21781.4	0	3561.57	19317.8	0	0	0	0	0	0	18738	22037.8	0	39874.7	28345.8	0	0	17300.6	27117.6	39269	11170.5	0	0	13017.6	14255.3	7897.07	39874.7	0	45530.8	8739.44	0	0	0	34328.3	0	13630.5	22212	37671.4	0	0
180,4s : 203,003m/z	9569.64	8899.36	5487.66	5565.41	11456.5	0	9827.81	6315.61	0	6883.88	7104.27	0	19435.8	9252.21	0	0	0	9240.7	0	0	0	8218.13	21519.2	26672.9	8958.07	4622.5	11602.4	11754.1	5130.26	5079.79	13362.2	0	0	4088.93	3747.78	0	0	13996.9	6758	4384.04	0	0	10270.3	10014.8
181,3s : 477,176m/z	2089.33	1970.22	1174.15	1277.78	0	0	0	2616.15	1500.99	0	1924.12	0	1903.39	0	1479.31	0	1647.07	1501.08	3335.57	1491.35	727.08	0	2544.3	3863.02	1795.09	1748.86	0	0	1392.41	3030.08	2170.06	835.06	1612.66	0	0	0	0	0	1892.28	0	0	0	0	0
184,9s : 417,120m/z	10045.2	8357.09	8439.91	15036.7	9051.47	13362.2	14208	11464.4	10869.4	2423.34	5487.66	8617.16	10865.7	5459.21	9791.85	7718.38	7097.85	8108.42	9320.76	15022.1	0	4237.88	7380.64	8650.99	13686.6	3904.28	10195.1	7466.82	7825.48	9741.67	15273.7	4684.54	17634.7	5398.32	4043.68	18368.5	11694.7	12634.1	15314.8	16919	9074.93	11731.6	16733.7	16411.4
186,5s : 187,007m/z	64022.4	47326.2	8810.04	16919	69179.7	46021	5678.62	36699.3	11948.4	0	77248.5	50948.6	49319.2	6783.81	11953.1	33997	0	16733.7	0	37945.8	0	20901.3	70366.9	66205.4	29486.2	0	44863.2	42125.9	0	9131.69	0	0	0	0	22095.9	41049.3	0	9240.7	57400.7	33997	0	34975.2	79727.3	81194.6
186,6s : 111,082m/z	3196.13	5636.08	9007.72	10865.7	7544.31	10164.2	13583.3	11754.1	18481.3	0	0	5382.47	7157.34	6419.75	3015.69	7195.58	6096.93	8405.82	6224.78	10523.3	0	0	6834.52	8172.72	8734.05	5793.22	8859.53	8722.53	0	10371	11238.6	6655.83	11763.2	4572.41	9098.23	8146.44	5991.65	11505.6	7743.73	10977.4	0	15065	20111	15158.8
186,6s : 173,082m/z	0	11085	23691.1	29989.3	13754.6	19608	29208.2	27255.4	39794.8	0	0	17856.1	14883.9	0	0	0	17976.2	19317.8	10286.3	0	4984.12	0	18217.4	16646.7	16571.1	12828	15464.5	0	0	23057.3	32489.5	15773.6	28719.8	17659.3	12365.1	23691.1	0	23691.1	0	22664.2	0	19968.1	56763.2	32824.3
189,4s : 443,173m/z	4225.35	3656.49	6007.38	4481.42	0	8068.03	9147.6	6220.42	15805.2	2582.98	8355.82	5502.53	0	0	4034.13	9098.23	0	4709.1	0	6062.04	2529.24	0	5530.45	0	7391.73	2029.77	5382.47	7811.22	6586.88	10707.1	10825.5	0	6618.23	0	0	7669.78	0	5818.15	6021.32	7416	11909	6400.36	11072.8	14883.9
193,8s : 100,004m/z	0	0	12375.6	0	8270.04	9320.76	12203.6	5979.54	11319.7	3432.32	0	6506.04	0	5352.82	5758.98	0	0	5608.71	0	9005.08	0	0	6952.75	10366.2	12925.3	5643.22	7093.04	9135.69	0	0	9332.12	8357.09	9645.02	4227.96	0	6834.52	6611.41	7788.31	7104.27	6977.3	0	8206.31	10149.1	6853.06
193,8s : 142,066m/z	0	3266.12	5889.55	4980.22	4891.91	4114.35	5748.16	4703.36	5751.17	0	0	3309.92	4464.45	0	2310.72	0	0	0	2319.49	3336.59	0	0	4118.59	5808.88	4512.06	2394.34	3555.33	7925.68	1699.41	0	4761.06	0	5182.36	2579.49	0	3266.12	4472.06	5076.34	4481.42	0	0	3872.85	6618.23	4169.51
194,0s : 385,186m/z	5104.78	10792.1	7157.34	6470.31	6952.75	5716.84	5176.01	6890.18	0	1845.31	6883.88	1760.72	13146	0	8636.67	11900.1	5926.74	6337.83	7641.87	10760.3	1875.72	0	0	0	5076.34	3402.08	5154.28	4145.58	4288.48	8866.62	7718.38	0	3183.9	3948.17	4428.74	10014.8	0	12375.8	11843.9	9757.04	12189	0	0	12840.3
194,1s : 165,056m/z	0	0	0	14095.2	0	0	31244.8	0	0	1486.95	3941.54	4873.09	109491	13508.8	2628.72	57592.7	5144.9	7000.73	50687.7	11530.7	1926.3	13682.2	0	12761.2	0	6326.15	0	38626.4	1937.62	8473.88	0	122634	0	7854.42	0	52684.6	0	0	0	0	126832	50661.8	0	0
194,1s : 121,066m/z	0	12870.1	3019.58	0	5029.04	2920.6	12671.6	0	9265.21	1262.31	2638.06	0	33836.6	8176.94	1105.05	0	0	0	20878	4899.73	740.36	5064.07	2207.14	7097.85	2332.42	0	4180.29	13362.2	1256.47	3916.2	3414.88	46021	4500.06	5144.9	2822	26672.9	3279.64	3137.99	2434.55	0	61111	22485.2	3836.03	0
197,9s : 160,077m/z	0	1900.48	3196.13	1679.71	3614.11	2767.79	0	2923.97	13685	2002.81	3216.58	1796.36	1689.68	3656.49	1746.82	6258.59	3929.33	3825.64	6586.88	8315.55	0	1738.42	3854.12	2910.13	3389.82	1611.75	0	3266.12	0	3439.05	3904.28	1409.12	0	1611.2	0	2535.6	5054.25	4876.46	6454.98	3866.47	0	6118.06	11530.7	8448.09
197,9s : 204,067m/z	0	0	0	0	0	0	4906.71	3116.61	14995.1	2092.22	3373.43	0	0	3506.37	1837.06	8333.27	3208.64	4789.69	5753.08	9938.7	0	3081.03	3501.38	2691.3	3501.92	0	2755.13	3718.24	0	0	3647.56	0	3153.49	0	0	0	0	7344.67	7609.76	2755.13	6470.31	7876.46	10371	10909.1
202,0s : 473,146m/z	7816.45	9791.85	7897.07	13356.1	0	16411.4	8967.35	10591.2	4265.41	3836.03	8967.35	10807.9	16027.1	4769.06	1970.22	18080.6	6741.3	7816.45	14745.5	0	2962.44	0	13407.7	9405.66	8146.44	4925.86	8357.09	5709.88	8649.35	10909.1	9192.06	0	1058.82	4843.25	4255.66	17230.2	16562.8	18368.5	12828	16176.3	15390.4	0	0	0
202,2s : 197,083m/z	1935.26	0	6620.68	0	5565.41	4744.42	10154.8	4629.3	0	0	5113.67	3033.17	0	4165.2	0	2852.88	2847.11	2153.78	0	5099.33	1261.94	0	0	4736.42	0	2543.94	0	5590.56	0	4368.19	6498.68	3461.37	5099.33	2291.73	0	4422.2	1419.4	0	0	2207.14	0	3759.09	0	11224.3
204,0s : 199,043m/z	6269.23	7968.31	21441	0	9415.39	4925.86	17505	7811.22	6025.13	5639.63	11731.6	14104.2	0	8017.8	6634.02	8696.44	9923.73	12484.4	14208	15586	5793.22	9168.24	5450.3	8810.04	10330.7	9540	4549.53	9968.9	8038.3	11561.6	0	10408.7	0	6542.4	4505.78	6731.47	7984.31	13640.8	12203.6	10754.3	7742.18	8792.31	26305.7	16820.8
205,6s : 389,094m/z	1465.62	1837.06	1982.16	0	1812.69	1253.64	2688.03	1773.56	3825.55	0	0	1424.63	0	0	1535.82	2654.2	0	0	0	2762.62	0	1463.65	0	2465.56	1405.9	0	0	1361.55	887.9	0	1508.74	0	0	1047	1351.89	0	0	0	2046.82	0	3107.73	0	3489.43	2571.6
211,5s : 217,108m/z	0	0	0	0	0	1382.73	0	3264.44	0	2525.06	4816.41	0	2721.68	0	0	23370.9	11824.2	21402.2	4543.07	14138	0	0	3981.28	0	0	1303.22	0	3419.16	0	5178.45	6039.13	0	0	1724.17	0	0	7843.39	5324.76	16521	17539.4	10140.4	11953.1	27842.5	38407
211,7s : 289,113m/z	19711.3	21153.3	34328.3	56646.2	31770.4	36030.1	67469.9	31244.8	24800.7	11238.6	43380	14759	31471.1	28846	22664.2	12569.8	8967.35	4388.85	4769.06	21933.7	11332.6	10195.1	36030.1	41691.1	38307.6	8922.25	19474.3	35894.8	17505	62739.7	46519.7	24266.5	32922.1	18457.1	15031.7	32134.3	18541.5	41049.3	9828.27	11224.3	19075.1	7104.27	38626.4	45827.8
212,4s : 125,097m/z	4642.39	9217.97	17211.5	32703.1	0	18174.5	19651.5	23790.3	22562.7	3172.9	8749.99	9364.2	15534.9	15590.9	0	12813.9	10935.1	16011	13723.2	13221.7	0	0	16977.8	18854	18481.3	10802.4	14104.2	14104.2	6172.43	21041.9	25282	9347.72	21933.7	15773.6	10676.9	22212	10991.8	20467.9	11618.4	21541.3	28077.7	23608.7	30954.8	19155.6
212,4s : 187,098m/z	17419.5	24849.1	52684.6	70366.9	50211.8	50948.6	72825.1	54817.2	71130.9	7544.31	30954.8	32489.5	37296.4	57439.9	27117.6	52351	39269	31244.8	41242.5	0	12282.6	15065	38626.4	55584.1	57592.7	29705.7	50948.6	56763.2	20013.5	70132	67005.2	33317	61111	45974.2	40847.6	72825.1	29989.3	58881.4	30681.3	62694.6	86942.5	67005.2	65279.7	48403.1
212,5s : 169,087m/z	2476.55	2628.72	4578.6	7148.3	3973.19	8202.67	7895.98	9560.46	7696.02	802.48	2589.32	3992.57	6118.06	4221.89	2170.06	4629.3	4821.94	4061.7	4150.72	3092.66	1975.86	1374.53	4815.23	7767.89	5664.54	0	5940.28	3840.21	1748.86	4744.42	7148.3	2910.69	6809.25	0	4861.17	6337.83	0	6246.68	3801.54	5837.88	8329.64	0	10723.4	5196.32
212,8s : 403,141m/z	1825.96	2567.19	1685.04	1492.31	6834.52	0	0	0	4115.41	920.58	1114.87	3409.67	2232.09	3944.9	2968.47	4459.16	0	0	2118.13	2202.8	0	1195.07	1009.43	1137.73	2453.97	1004	0	1368.51	0	2399.46	2999.14	1563.19	0	828.74	0	5324.76	983.28	916.06	1970.22	0	0	4627.77	5879.55	5391.75
213,7s : 337,040m/z	0	1599.86	3503.38	5403.78	2013.94	0	5535.86	813.19	4709.1	1226.27	3335.57	0	2628.72	3264.44	1782.08	913.59	1247.08	1118.68	0	0	869.47	0	2960.02	0	4038.68	0	1569.9	4298.78	0	0	3441.64	0	2231.39	1499.8	0	3200.49	0	4012.97	1717.22	0	0	0	2281.67	5343.21
214,1s : 243,125m/z	0	0	0	7033.6	0	0	6413.21	8357.09	0	0	5771.16	0	1957.01	0	4100.14	10296.3	0	25998.7	0	0	0	0	0	0	4448.5	3339.82	0	0	0	0	8245.59	0	10270.3	2143.34	3172.9	4469.88	0	9020.17	17200.3	10433.5	9977.35	10182.7	33385.4	14272.5
215,4s : 343,086m/z	1614.94	3074.57	6946.78	2941.23	3804.45	3101.19	5224.96	0	9374.08	0	6981.66	0	2418.07	3992.57	3956.9	3397.87	2991.46	3123.37	0	5502.53	0	1512.49	0	2819.4	3067.16	0	2606.73	0	1798.93	7112.45	3543.58	2210.86	8357.09	1459.84	0	3338.41	3361.36	0	2825.19	2904.03	4064.88	4833.69	4435.74	4108.14
215,9s : 225,079m/z	0	2379.98	0	4800.65	5196.32	4626.8	10764	7131.54	0	0	0	3555.33	0	8345.73	0	4285.05	0	0	3714.39	7843.39	1706.16	3493.78	3887.83	5926.74	0	0	4873.09	6475.77	0	6118.06	8857.26	0	6924.05	3043.54	0	4876.46	2245.87	4585.27	4852.31	0	8008.4	0	7489.46	10286.3
216,4s : 201,023m/z	23135.6	0	0	4100.14	62739.7	64022.4	0	0	3577.61	932.69	0	29641.6	3279.64	0	0	66076.6	0	6776.17	2686.7	0	0	16106.4	64022.4	59246.1	0	0	0	4105.82	0	0	61111	0	0	20901.3	16835.7	48403.1	44375.5	2960.02	82952.1	55225.7	30954.8	20901.3	72825.1	67724.4
216,6s : 203,129m/z	0	2266.33	2726.32	4852.31	3768.68	6297.01	0	0	3309.09	0	3489.43	5154.28	4012.97	0	0	0	0	0	1642.98	0	1606.9	1018.35	4693.36	0	4088.93	4722.72	3840.21	4545.44	2110.36	0	12598.5	2841.64	16510.7	0	1189.27	0	4410.75	3378.27	2997.38	7884.91	0	0	9096.83	7225.94
217,8s : 381,228m/z	1075.99	0	3475.29	0	0	2409.97	2443.79	3824.1	2029.77	2050.82	4436.55	0	1530.28	0	3220.03	5894.37	1630.27	0	1071.94	6549.53	1284.24	0	0	2888.51	3467.58	1241.77	1082.1	2789.45	2277.39	4624.8	3773.19	2428.48	3417.88	0	1636.72	3851.4	4272.05	0	6139.71	2812.18	8448.09	6220.42	4708.92	4569.73
219,1s : 275,094m/z	1520.01	0	6823.79	0	0	0	3467.58	0	1487.23	0	3183.9	8003.4	5724.11	0	0	0	9271.76	2713.82	7097.85	1944.27	0	0	0	0	1811.07	5510.44	9364.2	0	0	2082.21	3176.52	0	1663	11432.7	0	12634.1	2143.34	2260.64	0	0	5397.29	0	5450.3	0
222,1s : 357,102m/z	0	6348.1	10386.2	5502.53	6506.04	6074.59	11678.1	2888.51	15464.5	2232.36	13485	4401.06	4589.18	6196.61	10112	5751.17	2670.64	3352.63	2656.57	9741.13	2091.14	2262.97	3693.04	6981.66	6326.15	0	1813.94	4806.32	3610.55	5885.1	9892	3234.08	10759.2	3252.14	3013.96	3777.1	5771.16	5664.54	5553.77	4145.58	5894.37	4372.58	9285.48	0
223,6s : 155,107m/z	2318.76	5130.26	13992.6	9741.04	10306.9	10371	16940	0	0	3519.37	0	5818.15	6675.64	0	5636.08	0	0	0	8859.53	0	1090.42	0	15065	0	6789.7	4059.3	8185.31	10650.7	4761.06	8315.55	12365.1	5850.64	9876.9	4298.78	0	7489.46	0	18974.4	0	20467.9	17659.3	18217.4	47957.1	0
223,7s : 199,098m/z	7544.31	16048.1	43578.2	0	0	0	43294.1	22095.9	67005.2	14670.6	17407.5	13221.7	0	0	16048.1	71376.3	50948.6	134024	27085.5	56763.2	0	0	28345.8	21541.3	0	14842.8	0	28181.2	16261.3	0	0	12620.6	0	12246.9	0	0	33208.4	52684.6	51240.6	68536.3	0	42875.8	125458	121439
223,7s : 181,087m/z	0	2110.36	4629.3	3043.54	4169.51	2474.53	4313.63	0	0	1160.32	1958.38	0	0	2767.79	0	5405.54	0	13109	0	5879.55	0	0	4933.91	3400.14	0	0	2143.34	3956.9	1342.69	0	2967.34	0	3352.63	0	0	3071.25	4202.35	5748.16	5663.27	6538.04	4865.28	6297.56	14985.3	13996.9
224,3s : 377,072m/z	3677.62	3378.27	3235.44	3867.37	5940.28	14708	8120.05	1437.67	7163.53	1962.1	2542.67	11939.4	7955.13	2589.32	897.62	7096.31	0	2046.82	0	7598.13	659.37	3134.62	9167.43	5020.06	3262.23	696.97	1598.06	3524.64	1519.65	1606.69	4207.22	3185.45	0	0	1962.1	10227.2	13600.8	9395.66	2149.88	5116.03	12442.6	2893.78	13296.1	17600.4
225,4s : 385,169m/z	0	4486.78	0	0	0	0	12517.1	8068.03	37389.9	8617.16	18481.3	0	0	16176.3	8146.44	0	0	14842.8	0	18767.9	0	4082.38	9783.76	0	8008.4	0	6384.59	0	6980.66	15390.4	15647.5	0	9098.23	0	0	0	0	22212	14759	0	0	0	24193.8	31564.6
233,0s : 139,113m/z	0	1179.3	3548.04	3762.04	1656.32	2386.53	4137.59	1997.66	4048.98	0	1530.28	0	1330.78	1581.59	1336.22	0	0	6229.29	1926.3	4693.36	0	0	1842.36	2756.59	1535.82	781.4	2193.86	1719.5	0	1660.41	2885.24	0	2376.07	1058.82	1200.15	2017.02	2947.46	3027.36	3276.55	0	3543.58	3071.25	11953.1	3804.45
233,1s : 201,114m/z	3825.64	0	16571.1	21402.2	15773.6	17634.7	0	12466.6	26305.7	6096.93	8562.13	0	12159.3	11659.4	5130.26	25141.6	20013.5	43578.2	17503	47868.4	3934.86	7533.31	19608	12962.6	12598.5	7843.39	0	15647.5	13577.3	16646.7	18767.9	0	26393.3	7683.2	10991.8	13296.1	20467.9	26672.9	28596	37389.9	41824.8	28719.8	115088	23790.3
233,8s : 239,093m/z	898.37	0	2427.39	0	1716	2714.45	3378.27	2522.79	4624.8	1535.82	0	2193.86	0	2083.85	0	3426.91	0	2869.61	2474.89	3782.15	0	1586.74	3359.55	2115.99	2267.6	0	0	2854.34	1535.82	0	4088.93	0	4048.98	858.02	2124.86	0	0	0	2320.49	2631.95	0	3187.81	8728.5	0
233,9s : 316,123m/z	0	0	0	4359.19	1329.54	0	0	2276.48	1933.35	0	2091.31	0	0	0	2789.17	5224.96	1871.47	0	0	0	0	0	3623.07	5144.9	0	939.7	2063.48	2228.14	0	3248.86	0	0	0	805.09	0	1739.42	5253.77	4288.48	4061.7	3581.55	6158.15	5837.88	12572.7	2179.24
237,4s : 213,115m/z	0	1505.73	0	0	2188.14	0	3677.62	0	2269.98	0	1655.43	0	1172.99	0	0	4401.06	2275.86	3266.12	0	4169.51	0	0	3432.32	3154.22	1449.81	1453.94	0	3493.16	1724.17	0	0	1178.53	4388.85	0	2188.14	0	0	2598.17	3768.68	0	0	0	12190	0
243,0s : 315,196m/z	1233.02	2214.72	10195.1	3602.97	7093.04	0	4468.24	5117.9	4572.41	0	8038.3	2042.24	0	5144.08	4237.88	8866.62	1948.36	0	3039.45	6454.98	0	2428.48	2438	3236.44	3982.05	1179.3	0	5324.76	5285.76	4103.91	6326.15	2958.18	3247.22	2319.49	0	4064.88	4972.71	2581.58	6266.5	4887.18	11014.4	4791.96	8405.82	7683.2
243,1s : 405,192m/z	0	0	4992.94	0	0	2280.4	4077.02	0	4529.3	0	4884.55	0	0	3814.59	1880.28	2789.45	1497.33	2110.36	0	4043.13	1048.91	0	2123.5	0	0	0	1681.53	1916.53	0	3948.17	2385.61	1930.44	1175.56	1686.95	0	0	0	2141.53	2659.5	0	0	0	4261.3	0
243,2s : 361,202m/z	0	4167.74	15415.8	13723.2	17777	7527.76	11917.9	4569.73	0	6613.32	23790.3	3886.1	12517.1	27255.4	6348.1	4925.86	11435.6	1848.04	5154.28	4261.3	5230.87	6834.52	1714.91	8514.77	14104.2	4413.38	0	13731.6	5635.96	12798	0	0	0	9958.9	19608	0	5678.62	0	13192.9	4779.15	6706.11	7000.73	15385.2	12517.1
248,4s : 427,181m/z	0	0	18365.2	5834.33	8120.53	6498.68	6337.83	6651.56	12870.1	0	14799.8	4954.55	3594.28	7590.76	12870.1	19435.8	0	12761.2	5361.79	10935.1	0	4843.25	6308.56	0	6924.05	0	0	7157.34	3783.58	7761.25	0	0	6124.18	3412.04	6405.85	5890.1	0	8832.77	10052.8	7101.54	11207.7	0	18059.2	13296.1
250,1s : 464,304m/z	3509.91	6959.21	0	3194.32	3189.59	1434.94	1705.29	4963.46	1858.47	0	0	0	0	0	0	6977.3	723.31	2243.32	0	691.01	0	12027.1	2749.49	0	0	0	0	1251.22	4522.66	6436.27	0	5193.49	564.48	0	1294.76	4355.55	8133.16	1164.71	1388.48	4105.82	0	6466.4	4069.11	2591.96
253,8s : 321,207m/z	0	3015.69	3402.08	3012.14	4018.52	0	6498.68	4444.78	10014.8	3747.78	8202.67	4629.3	0	10986.7	0	4344.46	3309.92	0	2187.25	8462.36	0	2392.61	2775.97	4796.41	3845.3	0	0	5144.9	2394.34	2287.85	4048.98	3363.55	0	5889.55	3545.77	4529.3	3574.18	6124.18	3493.78	0	0	5188.09	6315.61	7836.67
259,3s : 363,218m/z	2166.83	2344.45	15863.6	8696.44	10840.2	5069.98	0	0	8133.71	4712.83	7653.41	0	5885.1	0	11085	8196.31	2631.59	0	6703.92	11191.4	4600.45	6124.18	0	0	4856.08	0	2522.79	9312.31	4193.88	7641.87	8681.9	4169.51	12634.1	4659.9	8488.97	0	6857.6	4529.3	7993.76	0	9332.12	0	14730.5	0
260,8s : 332,155m/z	1323.19	1363.73	4345.37	2110.36	2301.61	0	0	1979.86	1361.55	2274.37	0	2212.91	1013.47	2614.28	0	3213.81	3039.45	3392.3	0	7148.3	0	2466.86	0	0	1751.75	0	1438.85	1660.5	0	2679.61	1708.98	1913.21	0	0	0	1343.96	0	0	3389.82	0	2944.56	1060.22	5079.79	5110.66
261,8s : 413,200m/z	11362.1	0	10707.1	0	0	6402.39	0	12118	34975.2	0	15890.6	7847.51	7828.12	13872.6	7968.31	13146	0	10851.5	10052.8	0	4084.66	3719.06	11558.2	9923.73	3801.54	5188.09	0	0	6764.35	34975.2	22562.7	6404.48	12053.7	5781.25	4954.55	4705.45	0	10014.8	1702.32	0	13356.1	10013.2	0	27937.7
279,4s : 349,238m/z	0	7112.45	2253.89	6392.81	3522.01	6613.32	4815.23	7669.78	2941.23	0	0	0	0	2443.79	0	10112	3424.52	5043.98	1345.4	2591.96	0	0	4081.57	5196.22	10869.4	0	3453.64	10154.8	0	2530.24	3236.9	0	8728.5	797.87	865.58	5818.15	15708.5	28142	4428.74	4317.18	34328.3	10597.4	11658	2718.64
284,5s : 405,264m/z	12484.4	0	72825.1	0	19088.7	0	0	0	0	0	0	12375.8	27255.4	0	3074.57	0	10591.2	13872.6	0	0	0	0	0	7696.02	0	14090.7	5036.85	2053.55	10707.1	95619.2	5664.54	2508.05	8242.52	12671.6	0	12375.8	0	4422.2	6655.83	110043	0	0	0	0
284,7s : 407,281m/z	77248.5	118589	0	64022.4	0	56763.2	61929.6	109491	61929.6	1018.61	1190.21	98654.9	0	3352.63	21153.3	142692	0	49319.2	30954.8	10286.3	9798.9	34975.2	15667.6	0	2984.84	0	16977.8	9464.63	75647.1	0	43250.6	11030.4	55225.7	0	3669.5	58881.4	125458	25350.5	36546.2	0	156073	122634	173487	55584.1
284,9s : 453,287m/z	10386.2	22664.2	9217.97	12053.7	3153.86	8922.25	10561.3	0	6906.24	0	0	0	0	0	0	16940	0	11085	4821.94	0	0	5643.22	1956.56	1760.72	0	1648.85	3092.75	1640.53	12868.7	13508.8	6857.6	0	5753.08	1191.69	0	8636.67	17976.2	3238.36	5485.79	14995.1	0	0	28181.2	9240.7
294,9s : 249,160m/z	0	0	2835.46	3412.04	2532.24	2202.8	953.78	3461.37	1910.3	1358.26	1717.22	3176.52	3555.33	2291.73	1550.47	0	2225.73	0	2929.15	2871.24	1307.82	3012.14	2722.59	0	3185.45	0	4119.23	1768.36	1284.24	2449.61	2225.01	4048.98	2086.49	0	2281.67	2873.13	1733.14	0	2686.7	0	0	0	2760.05	1439.85
297,1s : 349,238m/z	0	5391.75	2155.11	9098.23	5502.53	0	1571.72	5709.88	1752.48	1005.32	1380.43	3453.64	5994.74	2841	1420.67	9277.39	3594.28	2342.75	0	3751.33	0	0	4272.23	4600.45	8315.55	1056.91	0	4857.35	2859.24	1625.61	0	0	7864.24	0	957.13	5510.44	9405.66	0	3956.9	2690.49	14628.8	10991.8	9192.06	2012.76
304,2s : 345,208m/z	0	0	13255.7	2616.15	8432.18	3426.19	3256.5	5590.56	8956.53	1924.39	5193.67	0	3432.32	0	4486.78	2013.48	0	0	0	3471.54	0	2654.2	0	2564.65	3549.77	0	1951.54	4061.7	0	2822	5154.28	0	4891.91	3887.83	5926.74	2897.6	2166.83	1169.84	2920.6	0	2423.34	0	7916.79	6704.47
307,7s : 293,176m/z	1672.35	1567.45	1508.56	2287.85	2450.44	2856.43	2156.2	1232.47	2002.81	0	0	0	2842.46	0	1763.09	0	1613.75	2318.76	0	0	0	2286.66	1739.96	1588.47	1866.62	2356.63	2639.15	2676.17	702.92	0	1733.41	2763.71	1692.5	2510.59	0	2210.86	1295.85	1596.24	0	2511.27	1799.29	2371.77	2365.7	1498.24
